# Supplementary material
Source: publisher figshare collection journal article supplement (https://acs.figshare.com/ndownloader/files/9209305)
Supplement: Supplementary file 1 [file 9209305]

## Supporting Information

### Characterization and Control of Nanoparticle Emission during 3D Printing

*Ohhun Kwon,<sup>†,‡</sup> Chungsik Yoon,<sup>\*,†,‡</sup> Seunghon Ham,<sup>‡</sup> Jihoon Park,<sup>†</sup> Jinho Lee,<sup>†</sup> Danbi Yoo,<sup>†</sup> and Yoojin Kim<sup>†</sup>*

<sup>†</sup>Department of Environmental Health and <sup>‡</sup>Institute of Health and Environment, School of Public Health, Seoul National University, 1, Gwanak-ro, Gwanak-gu, Seoul 151-742, Republic of Korea

Number of Pages: 12

Number of Figures: 5

Number of Tables: 4

This supporting information document contains the following information:

|                                                                                                                                                                                                                                                     |         |
|-----------------------------------------------------------------------------------------------------------------------------------------------------------------------------------------------------------------------------------------------------|---------|
| <b>Figure S1.</b> Schematic diagram of the test chamber. -----                                                                                                                                                                                      | S3      |
| <b>Figure S2.</b> Cylindrical objects fabricated by 3D printing with multiple filament types. -----                                                                                                                                                 | S4      |
| <b>Figure S3.</b> Various filters attached to the back of both the extruder suction fan and the enclosure ventilation fan. -----                                                                                                                    | S5      |
| <b>Figure S4.</b> Field emission scanning electron microscope with energy dispersive X-ray spectroscopy (FE-SEM/EDX) images of particles emitted during 3D printing under the manufacturer-recommended and consistent-temperature conditions. ----- | S6      |
| <b>Figure S5.</b> Variation in the number concentration of nanoparticles over time during 3D printing for all control methods. -----                                                                                                                | S7      |
| <b>Table S1.</b> Specification of the filters attached to the extruder suction fan and enclosure ventilation fans. -----                                                                                                                            | S8      |
| <b>Table S2.</b> Average geometric mean diameters (GMD) measured by SMPS (10–420 nm) during 3D printing under manufacturer-recommended and consistent-temperature conditions. -----                                                                 | S9      |
| <b>Table S3.</b> Emission rates of various filament materials under the manufacturer-recommended and consistent-temperature conditions during 3D printing. -----                                                                                    | S10     |
| <b>Table S4.</b> Summary of experimental conditions and nanoparticle emission rates from other 3D printing studies. -----                                                                                                                           | S11-S12 |

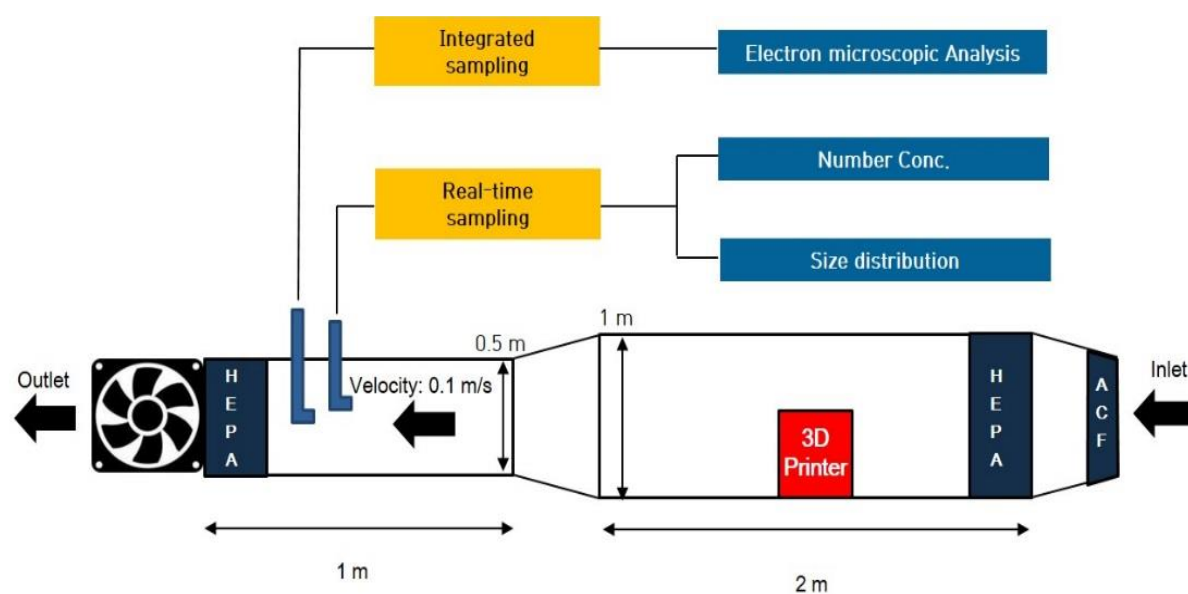

**Figure S1.** Schematic diagram of the test chamber.

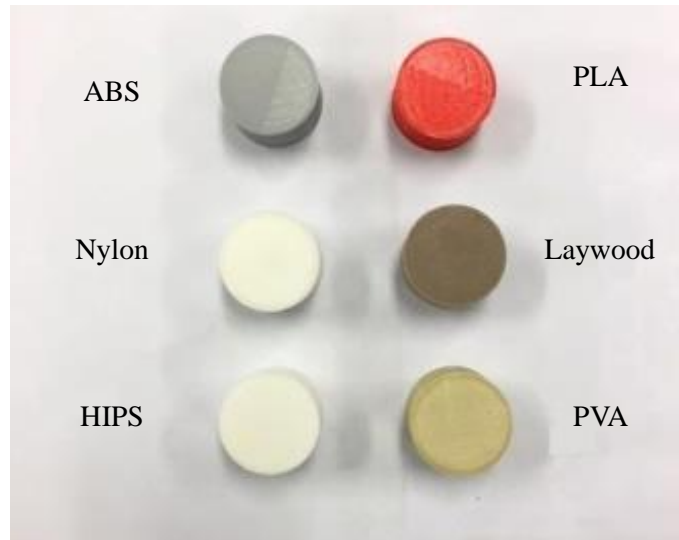

**Figure S2.** Cylindrical objects fabricated by 3D printing with multiple filament types.

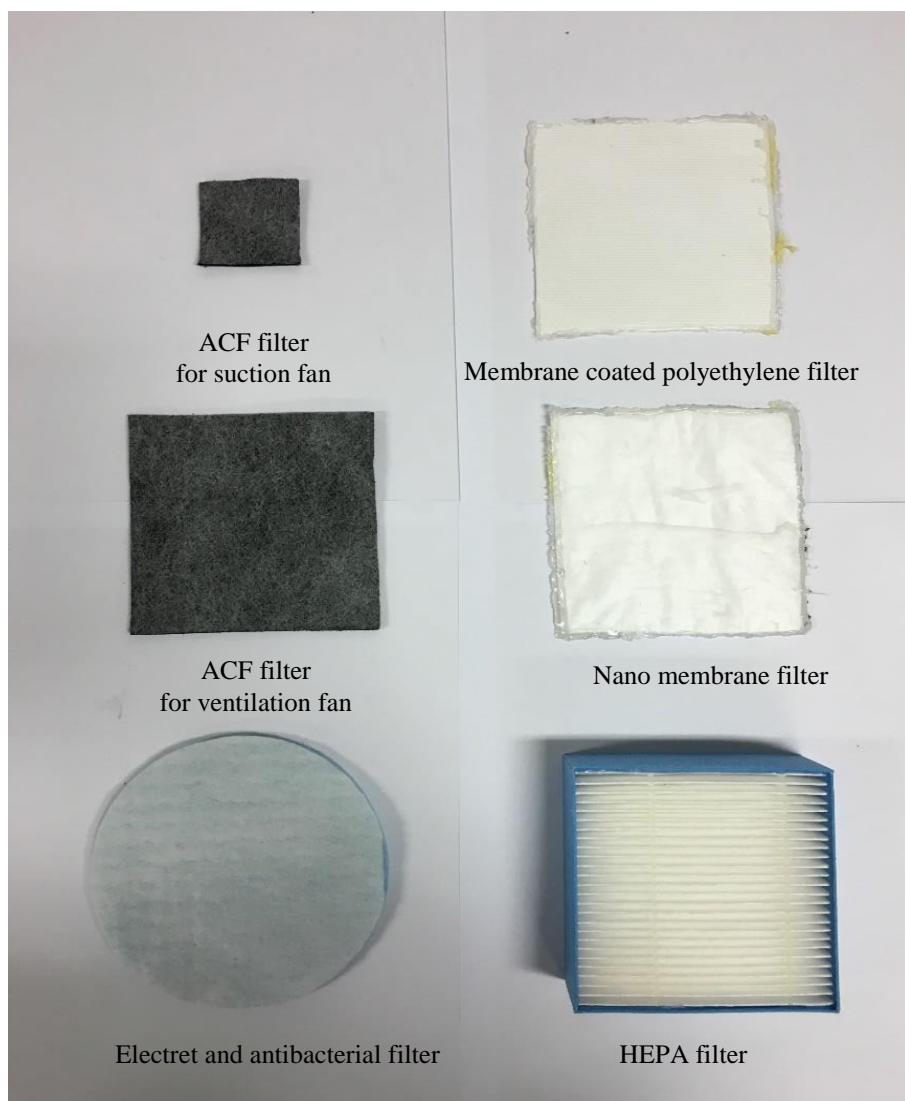

**Figure S3.** Various filters attached to the back of both the extruder suction fan and the enclosure ventilation fan.

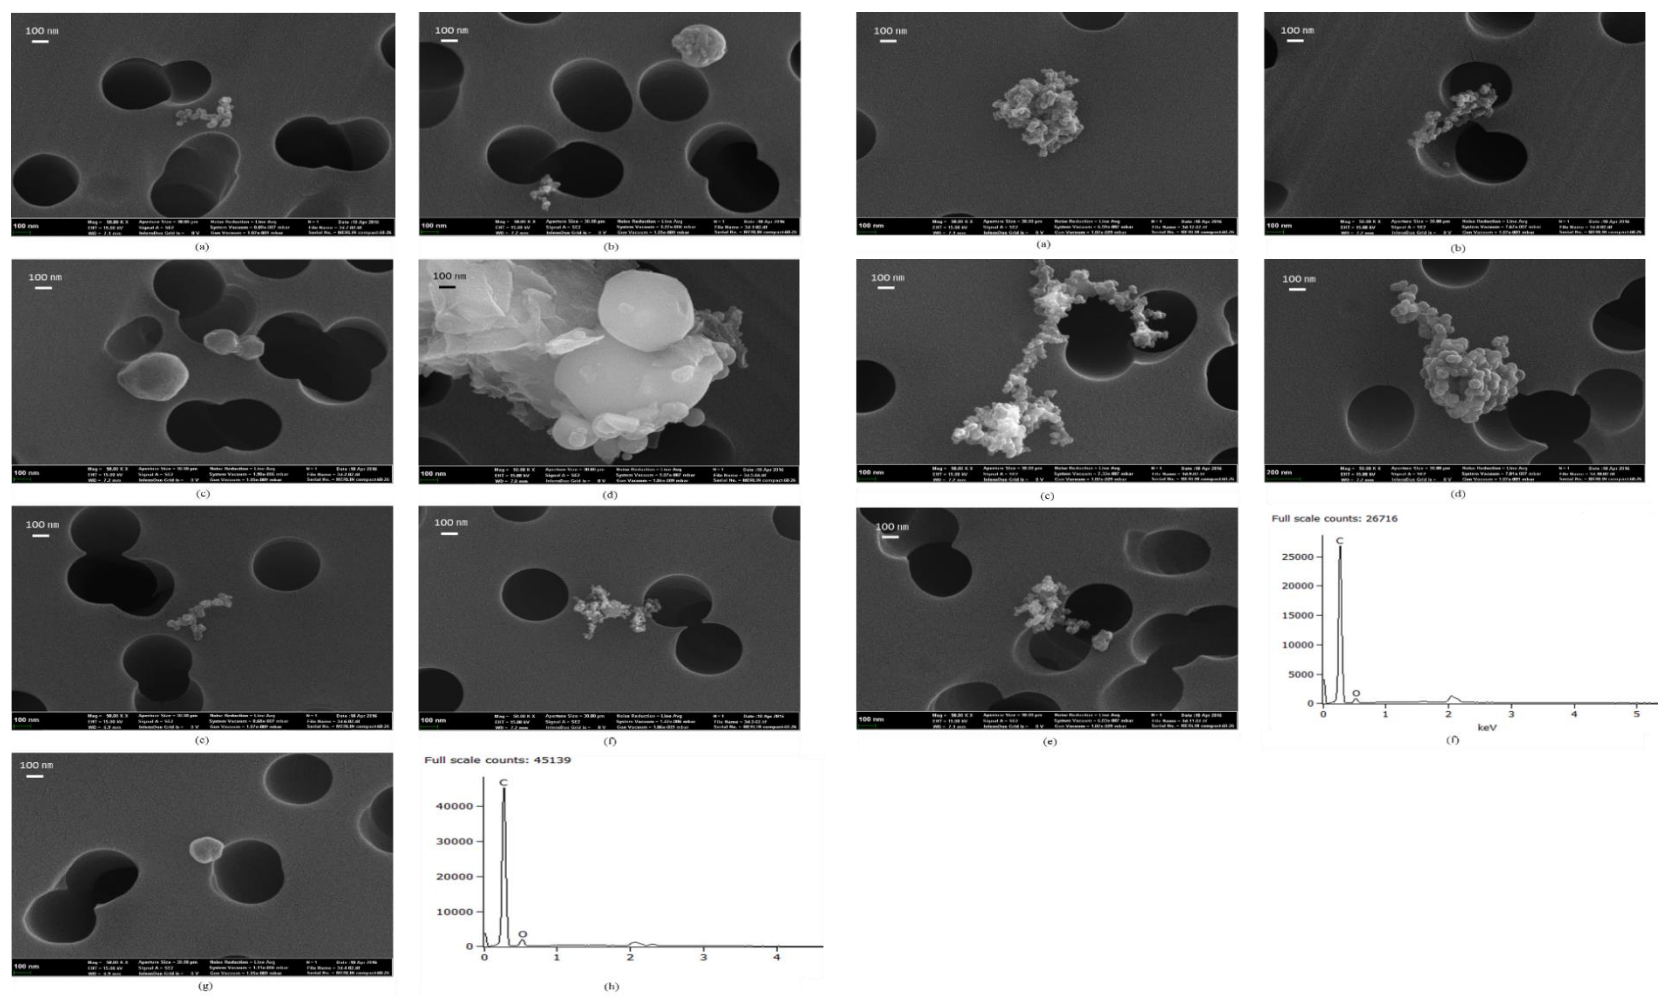

(A)

(B)

**Figure S4.** Field emission scanning electron microscope with energy dispersive X-ray spectroscopy (FE-SEM/EDX) images of particles emitted during 3D printing under (A) the manufacturer-recommended and (B) consistent-temperature conditions.

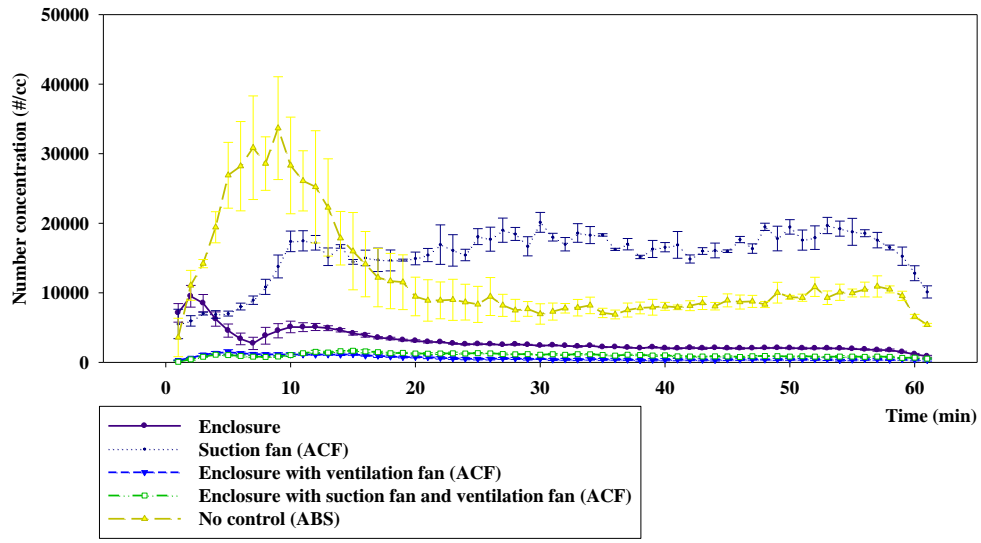

(a)

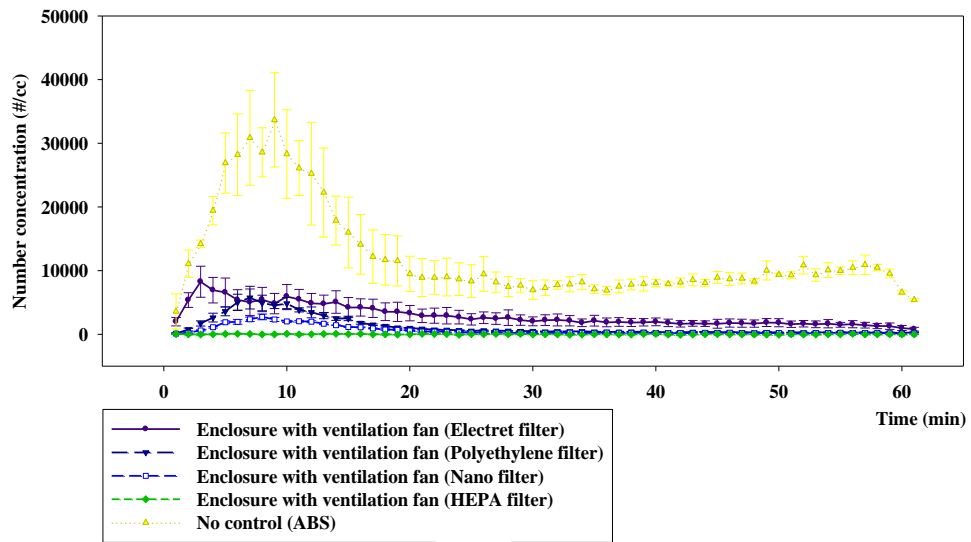

(b)

**Figure S5.** Variation in the number concentration of nanoparticles over time during 3D printing for all control methods.

**Table S1.** Specification of the filters attached to the extruder suction and enclosure ventilation fans

| Filter                                                                | Manufacturer             | Filter media material   | Thickness<br>(mm)          | Nominal<br>target<br>size | *Removal<br>efficiency<br>(Criteria) | Usage                                                         |
|-----------------------------------------------------------------------|--------------------------|-------------------------|----------------------------|---------------------------|--------------------------------------|---------------------------------------------------------------|
| Activated carbon filter (ACF)                                         | Geoyoungentech,<br>Korea | Activated carbon powder | 2.5                        | -                         | 72% (0.25 $\mu\text{m}$ )*           | VOC adsorption, deodorization                                 |
| Electret and antibacterial<br>filter                                  | Oclaire, Korea           | Polyester               | 5.3                        | 1–10 $\mu\text{m}$        | 60–80% (10 $\mu\text{m}$ )           | Medium filter of indoor air<br>purifier, antibacterial effect |
| Membrane coated<br>polyethylene filter                                | Daejin filter,<br>Korea  | Polyethylene            | 0.5                        | 1–5 $\mu\text{m}$         | 99% (5 $\mu\text{m}$ )               | Industrial fine-dust filter                                   |
| Nano membrane filter                                                  | Daejin filter,<br>Korea  | Polypropylene           | 1.5                        | 0.2–0.3 $\mu\text{m}$     | 96% (0.2 $\mu\text{m}$ )             | Industrial fine-dust filter,<br>industrial water purification |
| High-efficiency particulate<br>arrestance (HEPA) filter <sup>1)</sup> | Oclaire, Korea           | Glass fiber             | Frame: 35<br>(Filter: 0.9) | 0.3 $\mu\text{m}$         | 99.97% (0.3 $\mu\text{m}$ )          | High-efficiency particulate air<br>filter                     |

\*Notes: Removal efficiency (Criteria) was provided by each manufacturer

<sup>1)</sup> HEPA filter contains twenty-five folded glass fiber filters in a frame



**Table S2.** Average geometric mean diameters (GMD) measured by SMPS (10–420 nm) during 3D printing under manufacturer-recommended and consistent-temperature conditions.

| Conditions                          | Filament       | GMD (nm) | RSD (%)* |
|-------------------------------------|----------------|----------|----------|
| Manufacturer recommended            | HIPS           | 31.5     | 5.3      |
|                                     | Nylon          | 21.8     | 4.5      |
|                                     | ABS 1          | 45.6     | 18.8     |
|                                     | ABS 2          | 58.0     | 21.9     |
|                                     | PLA            | 57.2     | 5.8      |
|                                     | PVA            | 68.0     | 4.5      |
|                                     | Laywood        | 59.4     | 4.8      |
| Operating without filament material | Glue spread    | 52.1     | 3.5      |
|                                     | No glue spread | 50.4     | 3.1      |
| Consistent temperature              | ABS 1          | 43.0     | 17.9     |
|                                     | ABS 2          | 45.2     | 18.4     |
|                                     | PLA            | 27.2     | 15.8     |
|                                     | PVA            | 85.2     | 14.8     |
|                                     | Laywood        | 30.0     | 14.6     |

\*RSD: relative standard deviation.

**Table S3.** Emission rates of various filament materials under the manufacturer-recommended and consistent-temperature conditions during 3D printing.

| Conditions               | Filament | Nanoparticles (<100 nm) |                       | SMPS (10–420 nm)      |                       |
|--------------------------|----------|-------------------------|-----------------------|-----------------------|-----------------------|
|                          |          | #/min                   | #/g                   | #/min                 | #/g                   |
| Manufacturer recommended | ABS 1    | $3.00 \times 10^{10}$   | $1.57 \times 10^{11}$ | $3.28 \times 10^{10}$ | $1.71 \times 10^{11}$ |
|                          | ABS 2    | $1.83 \times 10^{10}$   | $9.54 \times 10^{10}$ | $2.14 \times 10^{10}$ | $1.11 \times 10^{11}$ |
|                          | PLA      | $3.18 \times 10^8$      | $1.32 \times 10^9$    | $3.61 \times 10^8$    | $1.49 \times 10^9$    |
|                          | PVA      | $5.10 \times 10^8$      | $2.28 \times 10^9$    | $8.12 \times 10^8$    | $3.62 \times 10^9$    |
|                          | Laywood  | $3.53 \times 10^8$      | $1.57 \times 10^9$    | $4.65 \times 10^8$    | $2.07 \times 10^9$    |
|                          | HIPS     | $3.26 \times 10^{11}$   | $3.18 \times 10^{12}$ | $3.37 \times 10^{11}$ | $1.78 \times 10^{12}$ |
|                          | Nylon    | $3.13 \times 10^{11}$   | $1.56 \times 10^{12}$ | $3.27 \times 10^{11}$ | $1.63 \times 10^{12}$ |
| Consistent temperature   | ABS 1    | $1.86 \times 10^{11}$   | $9.61 \times 10^{11}$ | $1.98 \times 10^{11}$ | $1.02 \times 10^{12}$ |
|                          | ABS 2    | $1.77 \times 10^{11}$   | $9.02 \times 10^{11}$ | $1.89 \times 10^{11}$ | $9.65 \times 10^{11}$ |
|                          | PLA      | $6.67 \times 10^{10}$   | $2.80 \times 10^{11}$ | $6.82 \times 10^{10}$ | $2.86 \times 10^{11}$ |
|                          | PVA      | $8.48 \times 10^{10}$   | $3.72 \times 10^{11}$ | $1.42 \times 10^{11}$ | $6.22 \times 10^{11}$ |
|                          | Laywood  | $6.73 \times 10^{11}$   | $2.93 \times 10^{12}$ | $6.93 \times 10^{11}$ | $3.01 \times 10^{12}$ |

**Table S4.** Summary of experimental conditions and nanoparticle emission rates from other 3D printing studies.

| Authors                | Model                           | Filament material  | Extruder temp (°C) | Heating bed temp (°C) | Bed prep     | Enclosure | Emission rate (#/min)                            |
|------------------------|---------------------------------|--------------------|--------------------|-----------------------|--------------|-----------|--------------------------------------------------|
| Stephens et al. (2013) | -                               | PLA                | 200                | 18                    | -            | -         | $2.0 \times 10^{10}$                             |
|                        | -                               | ABS                | 220                | 118                   | -            | -         | $1.9 \times 10^{11}$                             |
| Kim et al. (2015)      | Cube, 3D systems                | PLA                | 210-220            | -                     | -            | no        | $4.89 \times 10^8$                               |
|                        |                                 | ABS                | 250                | -                     | -            | no        | $1.61 \times 10^{10}$                            |
|                        | 3DISON plus, Rokit              | PLA                | 210-220            | -                     | -            | no        | $4.27 \times 10^8$                               |
| Azimi et al. (2016)    | FlashForge Creator              | PLA                | 200                | 110                   | Glue         | no        | $\sim 10^8$                                      |
|                        |                                 | ABS                | 200                | 110                   | Glue         | no        | $\sim 2 \times 10^{10} - \sim 9 \times 10^{10*}$ |
|                        | Dermel 3D Idea Builder          | PLA                | 230                | Room temperature      | Alcohol wipe | yes       | $\sim 10^9$                                      |
|                        |                                 | ABS                | 230                | 100                   | Glue         | yes       | $\sim 2 \times 10^{10} - \sim 9 \times 10^{10*}$ |
|                        | XYZprinting da Vinci 1.0        | PLA                | 190                | 45                    | Alcohol wipe | no        | $\sim 10^8$                                      |
|                        |                                 | ABS                | 240                | 110                   | Alcohol wipe | no        | $\sim 2 \times 10^{10} - \sim 9 \times 10^{10*}$ |
|                        |                                 | ABS (CUBE)         | 240                | 110                   | Alcohol wipe | no        | $\sim 2 \times 10^{10} - \sim 9 \times 10^{10*}$ |
|                        |                                 | HIPS               | 240                | 100                   | Alcohol wipe | no        | $\sim 4 \times 10^9$                             |
|                        | Lulzbot Mini                    | Nylon              | 230                | 65                    | Glue         | no        | $\sim 2 \times 10^8$                             |
|                        |                                 | Laywood            | 200                | 65                    | Alcohol wipe | no        | $\sim 8 \times 10^7$                             |
|                        |                                 | Laybrick           | 200                | 65                    | Alcohol wipe | no        | $\sim 6 \times 10^7$                             |
|                        |                                 | Polycarbonate      | 270                | 110                   | Glue         | no        | $\sim 4 \times 10^{10}$                          |
|                        |                                 | PCTPE              | 235                | 65                    | Glue         | no        | $\sim 2 \times 10^{10}$                          |
|                        |                                 | T-glase            | 240                | 60                    | Alcohol wipe | no        | $\sim 5 \times 10^9$                             |
|                        | Replicator 2X, MakerBot         | ABS                | 230                | 110                   | Glue         | no        | $\sim 2 \times 10^{10} - \sim 9 \times 10^{10*}$ |
|                        |                                 | ABS with enclosure | 230                | 110                   | Glue         | yes       | $\sim 2 \times 10^{10} - \sim 9 \times 10^{10*}$ |
| Patrick Steinle (2016) | Cube 2nd generation, 3D systems | PLA                | -                  | -                     | -            | no        | $2.1 \times 10^9$                                |
|                        |                                 | ABS                | -                  | -                     | -            | no        | $2.4 \times 10^8$                                |
| Yi et al. (2016)       | Replicator 2X, MakerBot         | PLA                | 215                | Room temperature      | -            | no        | $1.56 \times 10^{11} - 2.18 \times 10^{11**}$    |
|                        |                                 | ABS                | 230                | 110                   | -            | no        | $1.04 \times 10^{11} - 2.27 \times 10^{11**}$    |
|                        |                                 | PLA                | 180 - 240          | -                     | -            | no        | Negligible - $9.98 \times 10^{10}$               |
| Stabile et al (2017).  | Prusa i3, Prusa Research s.r.o. | Wood 1             | 220 - 240          | -                     | -            | no        | $5.77 \times 10^{10} - 2.64 \times 10^{11}$      |
|                        |                                 | Wood 2             | 230 - 240          | -                     | -            | no        | $1.91 \times 10^{12} - 2.78 \times 10^{12}$      |
|                        |                                 | Copper             | 220 - 240          | -                     | -            | no        | $1.98 \times 10^{12} - 1.96 \times 10^{12}$      |
|                        |                                 | Bamboo             | 210 - 240          | -                     | -            | no        | $1.65 \times 10^{10} - 2.65 \times 10^{12}$      |

|                         |                                                                 |                                            |           |     |   |    |                                             |
|-------------------------|-----------------------------------------------------------------|--------------------------------------------|-----------|-----|---|----|---------------------------------------------|
| Floyd et al.<br>(2017)  | Aworldnet A600                                                  | Flex PLA                                   | 240       | -   | - | no | $4.18 \times 10^{10}$                       |
|                         |                                                                 | Styrene-free copolymer                     | 220 - 240 | -   | - | no | $1.68 \times 10^{11} - 1.58 \times 10^{12}$ |
|                         |                                                                 | Carbon fiber-filled styrene-free copolymer | 220 - 240 | -   | - | no | $2.31 \times 10^{11} - 1.20 \times 10^{12}$ |
|                         |                                                                 | Nylon                                      | 230 - 240 | -   | - | no | Negligible – $1.55 \times 10^{11}$          |
|                         |                                                                 | NINJA-FLEX                                 | 220 - 240 | -   | - | no | Negligible – $1.39 \times 10^{11}$          |
|                         |                                                                 | PLA                                        | 210       | 70  | - | no | $0.1 \times 10^8$                           |
|                         |                                                                 | ABS                                        | 210       | 70  | - | no | $2.7 \times 10^8$                           |
|                         |                                                                 | PVA                                        | 210       | 70  | - | no | $1.2 \times 10^{10}$                        |
|                         |                                                                 | HIPS                                       | 210       | 70  | - | no | $0.5 \times 10^8$                           |
|                         |                                                                 | PCABS                                      | 210       | 70  | - | no | $6.0 \times 10^8$                           |
|                         |                                                                 | Nylon                                      | 210       | 70  | - | no | $1.2 \times 10^8$                           |
|                         |                                                                 | Bronze-PLA                                 | 210       | 70  | - | no | $3.9 \times 10^9$                           |
|                         |                                                                 | PET                                        | 210       | 70  | - | no | $2.6 \times 10^8$                           |
|                         |                                                                 | PLA                                        | 200       | 70  | - | no | $6.0 \times 10^8$                           |
|                         |                                                                 | PLA                                        | 230       | 70  | - | no | $3.6 \times 10^9 - 3.1 \times 10^{11}$      |
| Mendes et al.<br>(2017) | miniFactory 3 Education Edition Single Extruder, miniFactory Oy | ABS                                        | 230       | 90  | - | no | $2.2 \times 10^{10} - 3.7 \times 10^{11}$   |
|                         |                                                                 | ABS                                        | 238       | 90  | - | no | $2.3 \times 10^{12}$                        |
|                         |                                                                 | ABS                                        | 250       | 90  | - | no | $1.3 \times 10^{12}$                        |
|                         |                                                                 | ABS                                        | 230       | 110 | - | no | $2.4 \times 10^{11} - 7.2 \times 10^{11}$   |
|                         |                                                                 | ABS                                        | 238       | 110 | - | no | $4.8 \times 10^{11}$                        |
|                         |                                                                 | ABS                                        | 250       | 110 | - | no | $4.8 \times 10^{11}$                        |

\*In the Azimi et al. study (2016), the emission rates across all ABS printers with or without enclosure were expressed as a range.

\*\*Total particle emission with various color filaments measured by SMPS
